# Supplementary material for: CGMS and Glycemic Variability, Relevance in Clinical Research to Evaluate Interventions in T2D, a Literature Review
Source: Front Endocrinol (Lausanne). 2021 Sep 9;12:666008. doi: 10.3389/fendo.2021.666008 (PMC8458933; doi:10.3389/fendo.2021.666008)
Supplement: Supplementary Table 1 — Characteristics of studies included in Part 1 analysis. [file Table_1.xlsx]

## Sheet: Table S1 
Reference number	Authors	Title	Year	Source	Sample size	Analysed subjects	Mean Age (y)	Median age (y)	SD	SEM	IQR range	Gender (male/female)	BMI (kg/m2)	SD	SEM	Median weight (kg)	Mean weight (kg)	SD	SEM	IQR range	Median duration of diabetes (y)	Mean duration of diabetes (y)	SD	SEM	IQR range	Basal treatment	Comorbidities	Median HbA1c (%)	Mean HbA1c (%)	SD	SEM	IQR range	Fasting plasma glucose (mg/dL)	SD	SEM	Postprandial plasma glucose (mg/dL)	SD	SEM	Study design	Study completion rates	Study duration	CGMS duration	Type of glucose monitoring	Correlations	Type of statistical analysis	Other
27	Matsutani, D., Sakamoto, M., Iuchi, H., (...), Horiuchi, R., Utsunomiya, K.	Glycemic variability in continuous glucose monitoring is inversely associated with baroreflex sensitivity in type 2 diabetes: A preliminary report	2018	Cardiovasc Diabetol	94	94	62.1		11.9			66/28	26.2	5.0								9.7	9.6			Metformin 37%, SU 27%, TZD 11%, Glinides 3%, DPP4I 49%, α-glucosidases I 5%, SGLT2I 12%, GLP1ra 3%, Insulin 13%			7.7	1.5			141.8	36.4					Multicenter, prospective, open-label clinical trial		3 days	48h	CGMS	Univariate analysis: SD (r=-0.375, p=0.000), CV (r=-0.386, p=0.000), MAGE (r=-0,395, p=0.000), MBG (r=-0.099, p=0.341) significantly related to low levels of Baroreflex sensitivity (BRS). Multiple regression analysis: CV and MAGE were inversely related to BRS. These findings remained after adjusting BRS for age, sex, hypertension, dyslipidaemia, HR, eGFR, CAVI, CGM mean glucose.	Pearson’s correlation analysis and multiple-linear regression
28	Manski-Nankervis, J., Yates, C.J., Blackberry, I., (...), Best, J., O'Neal, D.	Impact of insulin initiation on glycaemic variability and glucose profiles in a primary healthcare Type 2 diabetes cohort: Analysis of continuous glucose monitoring data from the INITIATION study	2016	Diabet Med	89	78	59.2		10.4			46/32	32.1	6.0							10.4				6.5-13.3	Metformin 93.6%, SU 79.5%, TZD 12.8%, DPP4I 33.3%, α-glucosidases I 3.9%	CV disease 11.5%, proliferative retinopathy 5.1%, neuropathy 7.7%, nephropathy 15.4%	9.7				8.7-11.0							Post-hoc analysis of pharmacological intervention study (2 parallel arms, baseline and 24 weeks after insulin commencement)		24 weeks	7 days at baseline	CGMS	Univariate analysis: correlations at baseline with HbA1c : SD (0.0275, NS), J-index (0.6106, p<0.001), MAGE (0.0450, NS), Mean glc (0.6360, p<0.001). Correlations after 24 wks with HbA1c : SD (0.1254, NS), J-index (0.2046, NS), MAGE (0.0921, NS), Mean glc (0.2258, p<0.05). Correlation in changes (baseline to 24 wks) with HbA1c : SD (0.1435, NS), J-index (0.4498, p<0.001), MAGE (0.0424, NS), Mean …	Pearson’s correlation analysis
29	Farabi, S.S., Carley, D.W., Smith, D., Quinn, L.	Impact of exercise on diurnal and nocturnal markers of glycaemic variability and oxidative stress in obese individuals with type 2 diabetes or impaired glucose tolerance	2015	Diab Vasc Dis Res	17	17	46.5		6.1			3/14	36.9	3.8								< 7							6.4	0.9									Randomized cross over study with a single 30-min bout of moderate-intensity exercise or a sedentary behaviour		1 month	3 days twice	CGMS	Bivariate analysis: no correlation with 15-isoprostane F2t for SD and CONGA at baseline. Correlations with change in 15-isoprostane F2t after exercise: daytime SD (r=0.68, p=0.03), overnight SD (r=0.73, p=0.027). No correlation with CONGA1.	Bivariate Pearson’s correlations and regression analysis	(1) Subjects analysed are 11 T2D + 6 IGT
30	Bao, Y.-Q., Zhou, J., Zhou, M., (...), Lu, H.-J., Jia, W.-P.	Glipizide controlled-release tablets, with or without acarbose, improve glycaemic variability in newly diagnosed Type 2 diabetes	2010	Clin Exp Pharmacol Physiol	46	20 (Monotherapy Group (MG)) 20 (Combination Therapy Group (CTG))	52.6 (MG) and 54.7 (CTG)					21/19	25.5 (MG) and 25.3 (CTG)	3.0 (MG) and 3.3 (CTG)															7.9 (MG) and 8.0 (CTG)	0.8 (MG) and 0.8 (CTG)			7.9 mmol/L (MG) and 8.0 mmol/L (CTG)	1.4 (MG) and 0.9 (CTG)					8 wk randomized open-label active-comparator trial (monotherapy vs combination therapy)	0.87	8 weeks	3 days twice	CGMS	Multivariate analysis: change in MAGE did not correlate with change in HbA1c	Multivariate regression analysis
31	Shivaprasad, C., Aiswarya, Y., Kejal, S., (...), Gautham, K., Aarudhra, P.	Comparison of CGM-Derived Measures of Glycemic Variability Between Pancreatogenic Diabetes and Type 2 Diabetes Mellitus	2019	J Diabetes Sci Technol	61	56	45.1		11.9			30/26	24.4	3.9								6.0	5.6			SU n=37, TZD n=2, DPP4I n=24, α-glucosidases I. n=9, SGLT2I n=10, Insulin n=18			8.3	1.9			171.0	109.3		228.0	95.2		Randomized comparative study		NA	3 to 5 days	CGMS	Univariate analysis: no correlations between HbA1c and SD, CV, MAGE. Inverse correlations between HbA1c and TIR<70mg/dL and LBGI. Positive correlations between HbA1c and TIR>180 mg/dL, HBGI and J index (r2 =0.3-0.6). Multivariate analysis: HbA1c and the duration of diabetes were predictors of higher MAGE (p<0.05)	Pearson’s and Spearman’s correlation analysis and multivariate logistic regression analysis
32	Akaza, M., Akaza, I., Kanouchi, T., (...), Sumi, Y., Yokota, T.	Nerve conduction study of the association between glycemic variability and diabetes neuropathy	2018	Diabetol Metab Syndr	27	27	66.7		6.8				24.7	5.1								15.7	9.4			OAD, GLP1ra or Insulin	Diabetes retinopathy		7.6	1.0									Cross-sectionnal study		NA	7 days (5 days for MAGE)	CGMS	Univariate analysis: tendency toward a positive correlation between Hba1c and MAGE (r=0.292, p=0.067). MAGE negatively correlated to CNAP (r=− 0.32,p= 0.042). Multivariate analysis: MAGE negatively correlated to CNAP (p<0.05).	Spearman's correlation analysis and multiple linear regression analysis
33	Crăciun, C.I., Crăciun, A.E., Bocşan, I.C., (...), Roman, G., Buzoianu, A.D.	The C-peptide correlations and effect on the glycemic variability parameters in patients with type 2 diabetes	2018	Human and Veterinary Medicine	53	53	55.6		9.0			35/18	31.0	5.5		91.1				77.6-98.8	4.0				0-9.8	Metformin 67.7%, SU 29.0%, Incretines 22.6%, Insulin therapy 22.6%, Drug-naïve 41.5%			8.3	1.9									Retrospective study		NA	24h	CGMS	Univariate analysis: correlation between C-peptide concentration and CONGA1 (ρ=-0.337, p=0.014), CONGA2 (ρ=-0.234, p=0.028). Correlations of C-peptide quartile with J index (ρ=-0.271, p=0.05), TIR>126mg/dL (ρ=-0.275, p=0.046), CONGA1 (ρ=-0.332, p=0.015), CONGA2 (ρ=-0.298, p=0.03).	Pearson correlation analysis and Spearman correlation analysis
34	Suh, S., Joung, J.Y., Jin, S.M., (...), Lee, M.K., Kim, J.H.	Strong correlation between glycaemic variability and total glucose exposure in type 2 diabetes is limited to subjects with satisfactory glycaemic control	2014	Diabetes Metab	63	63	56.5		9.4			36/27	24.7	2.9								6.3	6.2			Lifestyle modification 12.7%, OAD only 74.6%, Insulin only 22.2%, Insulin + OAD 9.5%	Microalbuminuria 28.6%, nephropathy 12.7%, retinopathy 31.7%, neuropathy 9.5%		7.5	1.1			134.3	43.2					Cross-sectionnal study		NA	78.4 +/- 14.5h (middle 72h used for CGMS parameters analysis and middle 48h for MAGE)	CGMS	Univariate analysis: correlations between HbA1c and Mean glc (r=0.598, p<0.01), MIME ∆G (r=0.508, p<0.01), SD (r=0.546, p<0.01), MAGE (r=0.489, p<0.01), CONGA1 (r=0.444, p<0.01), MODD (r=0.528, p<0.01), CV (r=0.456, p<0.01). Correlations between FA and Mean glc (r=0.658, p<0.01), MIME ∆G (r=0.542, p<0.01), SD (r=0.508, p<0.01), MAGE (r=0.455, p<0.01), CONGA1 (r=0.524, p<0.01), MODD (r=0.541, p<0.…	Spearman’s correlation analysis
35	Jin, S.-M., Kim, T.-H., Bae, J.C., (...), Lee, M.-K., Kim, J.H.	Clinical factors associated with absolute and relative measures of glycemic variability determined by continuous glucose monitoring: An analysis of 480 subjects	2014	Diabetes Res Clin Pract	168	168		55.5			51-62.5	104/64	24.6	3.4								14.5	7.7			Insulin			8.8	1.7									Retrospective study		NA	73.8 +/- 15.0h	CGMS	Univariate analysis: correlation between HbA1c and SD (r=0.325, p<0.01) but not log(CV). Correlation between C-peptide and SD (r=-0.240, p<0.01), log(CV) (r=-0.427, p<0.001). Multivariate analysis: Correlation between HbA1c and SD (β=3.400, p<0.001) but not log(CV). Correlation between C-peptide and SD (β=-3.961, p<0.01), log(CV) (β=-0.092, p<0.001).	Spearman’s correlation coefficient analysis. Multivariate models analysis
35	Jin, S.-M., Kim, T.-H., Bae, J.C., (...), Lee, M.-K., Kim, J.H.	Clinical factors associated with absolute and relative measures of glycemic variability determined by continuous glucose monitoring: An analysis of 480 subjects	2014	Diabetes Res Clin Pract	231	231		57			51-64	147/84	25.3	3.3								9.0	6.8			Drug-naïve n=29, SU n=294, Metformin n=181, TZD n=26, DPP4I n=42, α-glucosidase I n=55			7.7	1.2									Retrospective study		NA	73.8 +/- 15.0h	CGMS	Univariate analysis: correlation between HbA1c and SD (r=0.323, p<0.001) but not log(CV). No correlation between C-peptide and SD and log(CV). Multivariate analysis: Correlation between HbA1c and SD (β=2.720, p<0.01) but not log(CV). No correlation between C-peptide and SD or log(CV).	Spearman’s correlation coefficient analysis. Multivariate models analysis
36	Chang, C.-M., Hsieh, C.-J., Huang, J.-C., Huang, I.-C.	Acute and chronic fluctuations in blood glucose levels can increase oxidative stress in type 2 diabetes mellitus	2012	Acta Diabetol	34	34	52.5		13.7			16/18	26.2	4.2								11.1	5.8			SU alone 0%, Metformin alone 9%, SU + Metformin 76%, SU + Metformin + TZD or DPP4I 15%			8.3	0.8			158.5	66.0					Cross-sectionnal study		NA	72h	CGMS	Univariate analysis: correlation between FBG and Mean glc (0.437, p<0.001). Correlation between MAGE and 8-Iso-PGF2α (0.600, p<0.01) and SD of HbA1c (2 years) (0.730, p<0.01) and TBARS (0,821, p< 0.001). Multivariate analysis: correlation of MAGE with 8-Iso-PGF2α (p<0.001)	Pearson’s correlation analysis. Multiple regression models	(1) The multivariate regression analysis showed that MAGE is more important than the SD of HbA1c levels in predicting 8-iso-PGF2a levels.
37	Christensen, M.B., Gæde, P., Hommel, E., Gotfredsen, A., Nørgaard, K.	Glycaemic variability and hypoglycaemia are associated with C-peptide levels in insulin-treated type 2 diabetes	2019	Diabetes Metab	98	98	61.9		9.8			68/30	33.0	5.8								18.4	7.4			Basal- bolus Insulin			71.9 (mmol/mol)	11.3			10.2 (mmol/mol)	3.2					Cross-sectionnal study		NA	6 days	CGMS	Univariate analysis: low level of Fasting C-peptide levels correlated significantly with high CV (r=-0.53, P < 0.0001). Multivariate regression: C-peptide was significantly associated with CV.	Spearman's correlation analysis. Multivariate regression model
38	Færch, K., Alssema, M., Mela, D.J., Borg, R., Vistisen, D.	Relative contributions of preprandial and postprandial glucose exposures, glycemic variability, and non-glycemic factors to HbA 1c in individuals with and without diabetes	2018	Nutr Diabetes	63	63	56.0		10.0			36/27	31.3	8.2			89.6	24.4											6.1	0.6			7.2 (mmol/L)	1.8					Multicenter study		12 weeks	2 days at baseline	CGMS	Linear regression analysis: correlation between Hba1c and MAGE, CV and SD (p<0.001). GV explains 13% of the variance in HbA1c. MAGE and SD are also associated to 1 SD of HbA1c increase before and after adjustement.	Linear regression analysis	(1) T2D with HbA1c≤6.5%
38	Færch, K., Alssema, M., Mela, D.J., Borg, R., Vistisen, D.	Relative contributions of preprandial and postprandial glucose exposures, glycemic variability, and non-glycemic factors to HbA 1c in individuals with and without diabetes	2018	Nutr Diabetes	34	34	53.7		8.8			11/23	35.2	8.1			95.8	25.5											7.5	1.2			8.6 mmol/L	2.8					Multicenter study		12 weeks	2 days at baseline	CGMS	Linear regression analysis: correlation between Hba1c and MAGE, CV and SD (p<0.001). GV explains 20% of the variance in HbA1c. SD is also associated to 1 SD of HbA1c increase before and after adjustement.	Linear regression analysis	(1) T2D with HbA1c>6.5%
39	Huang, Y., Heng, C., Wei, J., (...), Liu, Q., Jiao, K.	Influencing factors of glycemic variability in hospitalized type 2 diabetes patients with insulin therapy	2017	Medicine (Baltimore)	366	366	50.8					294/72	26.4									8.2			0-44	Insulin: 148 Multiple Daily Injections, 144 Premixed Insulin, 74 Continuous Subcutaneous Insulin Infusion	Diabetic retinopathy (n=70), diabetic nephropathy (n=130), history of CVD (n=72)		9.9 (MDI), 8.5 (PI), 9.2 (CSII)	2.2 (MDI), 2.5 (PI), 2.2 (CSII)									Cross-sectionnal study		NA	73.9 +/- 8.6h	CGMS	Linear analysis: HbA1c correlates with SD (β=0.113, p=0.0007 and MODD (β=0.198, p<0.0001) but not with logCV and MAGE. Fasting C peptide correlates with SD (β=-0.754, p=0.002), logCV (β=-0.394, p<0.0001), MAGE (β=-0.852, p=0.005) and MODD (β=-0.276, p=0.0007)	Generalized linear model	(1) Correlations were also tested with smoking status, family history of diabetes, dose of insulin, history of CVD, BP, ASAT, ALAT, lipids profile…
40	Jin, S.-M., Kim, T.-H., Oh, S., (...), Lee, M.-K., Kim, J.H.	Association between the extent of urinary albumin excretion and glycaemic variability indices measured by continuous glucose monitoring	2015	Diabet Med	173	123 (Control (CON)), 34 (UACR 30–299 mg/g), 16 (UACR ≥ 300 mg/g)	56,4 (CON), 57,7 (UACR 30–299), 57,8 (UACR ≥ 300)		8,7 (CON), 8,1 (UACR 30–299), 7,4 (UACR ≥ 300)			50/73 (CON), 12/22 (UACR 30–299), 3/13 (UACR ≥ 300)	24.8 (CON),26.2(UACR 30–299), 25.5 (UACR ≥ 300)	3.3 (CON),2.6(UACR 30–299), 4.6 (UACR ≥ 300)							10 (CON), 13 (UACR 30–299), 13 (UACR ≥ 300)				5-15 (CON), 6.5-18.0 (UACR 30–299), 11.0-19.5 (UACR ≥ 300)	Insulin: 41% (CON), 41% (UACR 30–299) and 81% (UACR ≥ 300)	UACR (urine albumin/creatinine ratio) 30–299 mg/g (n=34), UACR ≥ 300 mg/g (n=16)		8.1 (CON) 8.2 UACR 30–299 , 9.4 UACR ≥ 300	1.5 (CON) 1.5 UACR 30–299 ,1.8 UACR ≥ 300									Cross-sectionnal study		NA	74.2 +/- 13.9h	CGMS	Univariate and multivariate analysis: higher SD, MAGE, MODD and CV are not associated with odd of having UACR 30-299. Univariable analysis: correlation between UACR ≥ 300 mg/g and SD (odds ratio) (1.046, p=0.002), MODD (1.028, p=0.023) and MAGE (1.012, p=0.043) but not CV. Multivariable analysis: correlation between UACR ≥ 300 mg/g and SD after adjusting for HbA1c (1.042, p=0.025) but not MAGE, M…	Multinomial logistic regression analysis	(1) Independent association between SD and the extent of albuminuria was lost when the measures were normalized by mean glucose (CV not associated).
41	Tsai, C.-J., Hsieh, C.-J., Tung, S.-C., Kuo, M.-C., Shen, F.-C.	Acute blood glucose fluctuations can decrease blood glutathione and adiponectin levels in patients with type 2 diabetes	2012	Diabetes Res Clin Pract.	34	34	52.5		13.7			16/18	26.2	4.2								> 4				OADs			8.3	0.8			158.5	66.0					Cross-sectionnal study		NA	72h	CGMS	Univariate analysis: MAGE correlates with Adiponectin (r=-0.64, p<0.001), Glutathione (r=-0.54, p<0.001) and SD(HbA1c over 2 y) (r=0.73, p<0.001) but not with HbA1c or FBG. Mean glc correlates with Adiponectin (r=-0.40, p<0.05 but not with HbA1c or FBG. Multivariate analysis: MAGE is an independent predictor of adipo levels (p=0.002) and a significant one of glutathione levels (r2=-0.47, p=0.004)	Pearson correlation coefficient analysis and multiple regression models
42	Di Flaviani, A., Picconi, F., Di Stefano, P., (...), Frajese, G., Frontoni, S.	Impact of glycemic and blood pressure variability on surrogate measures of cardiovascular outcomes in type 2 diabetic patients	2011	Diabetes Care.	26	26	59.2		10.6			11/15	26.9	3.6								4.4	4.8						6.7	1.3			7.1 (mmol/L)	1.6					Cross-sectionnal study		NA	24h	CGMS	Univariate analysis: MIME∆G lunch negatively associated with FMD (r=-0.45, p=0.02). CONGA2 positively associated with LVMI ( r=0.55, p=0.006). No association between Mean glc and LVMI. Correlation between 8-isoPGF2a and CONGA2 (r = 0.57, P =0.003) and MIME∆G lunch (r = 0.52, P = 0.008). LH/LF associated with MAGE (0.4, p=0.04)	Pearson correlation coefficient analysis and multivariate regression analysis	(1) GV is associated with organ damage and oxydatif stress activation but HbA1c is not.
43	Lu J, Ma X, Zhou J, Zhang L, Mo Y, Ying L, Lu W, Zhu W, Bao Y, Vigersky RA, Jia W.	Association of Time in Range, as Assessed by Continuous Glucose Monitoring, With Diabetic Retinopathy in Type 2 Diabetes.	2018	Diabetes Care	3262	3262	60.4		12.0			1458/1804	25.1	3.4								8.1	6.8			OADs 34%, Insulin 68.4%	Mild NonProliferative Diabetic Retinopathy (NPDR) (n=355), moderate NPDR (n=198), Vision-Threatening DR (VTDR) (n=227)		8.9	2.2									Cross-sectionnal study		NA	72h	CGMS	Multivariate analysis: significant associations between TIR and the prevalenceof DR by severity (mild NPDR: p=0.018; moderate NPDR: p=0.014; VTDR: p=0.019)	Multinomial logistic regression analysis	(1) TIR was significantly associated with the prevalence of all stages of DR even after adjusting for clinical risk factors, including HbA1c.
44	Siegelaar SE, Barwari T, Kulik W, Hoekstra JB, DeVries JH.	No relevant relationship between glucose variability and oxidative stress in well-regulated type 2 diabetes patients.	2011	J Diabetes Sci Technol.	28	24		58.9			36-76	16/8	30.5	5.5								7.2	4.2			Metformin n=23, SU n=15, Rosiglitazone n=2			6.9	0.7			144	32		129	54		Cross-sectionnal study	85.71	NA	48h	CGMS	Univariate analysis: Significant correlation between HbA1c and MBG (0.63, p<0.01), SD (0.43, p<0.05), MAGE (0.44, p<0.05). Multivariate analysis: no correlation between MAGE or SD and 8-iso-PGF2α.	Spearman correlation analysis and multivariate regression model analysis
45	Hayashi A, Takano K, Masaki T, Yoshino S, Ogawa A, Shichiri M.	Distinct biomarker roles for HbA1c and glycated albumin in patients with type 2 diabetes on hemodialysis	2016	J Diabetes Complications	97	97	60.2 (HD) 55.9 (WN)		11.7 (HD) 16.7 (WN)			27/14 (HD) 26/30 (WN)	24.3 (HD) 24.0 (WN)	4.4 (HD) 4.5 (WN)								19.6 (HD) 13.7 (WN)	10.1 (HD) 9.1 (WN)			Insulin ± OAD (n=36 HD, n=38 WN), GLP1ra (n=1 HD, n=2 WN), OAD only (n=3 HD, n=15 WN), Drug-naïve (n=1 HD, n=1 WN)	41 on hemodialysis (HD), 56 without nephropathy (WN)		6.3 (HD) 9.0 (WN)	1.1 (HD) 1.8 (WN)			143.3 (HD) 167.0 (WN)						Cross-sectionnal study		NA	72h	CGMS	Univariate analysis: in HD group, MBG correlates with HbA1c (r=0.66, p<0.0001), GA (r=0.53, p=0.0008). SD correlates with HbA1c (r=0.66, p=0.0013 ), GA (r=0.53, p<0.0001 ). HbA1c correlates with J-index (r=0.70, p<0.0001), MAGE (r=0.63, p<0.0001), MODD (r=0.47, p=0.0020), IGC (p<0.01). GA correlates with J-index (r=0.62, p<0.0001), MAGE (r=0.57, p<0.0001), MODD (r=0.52, p=0.0005), IGC (p<0.05). I…	Linear regression analysis
46	Chon S, Lee YJ, Fraterrigo G, Pozzilli P, Choi MC, Kwon MK, Chin SO, Rhee SY, Oh S, Kim YS, Woo JT.	Evaluation of glycemic variability in well-controlled type 2 diabetes mellitus	2013	Diabetes Technol Ther.	53	39	56		9.6			27/12	25.4	3.6								4.9	5.0			Drug-naïve (n=9), OAD (n=26), Insulin (n=4)			6.3	0.3									Cross-sectionnal study	73.58	1 week	72h twice (V1 and V2)	CGMS	Mixed model analysis: at V1 : FA correlates with MBG (p<0.01), MIME∆G (p<0.01), MAGE( c) (p<0.05) but not with SD (p=0.061) or MAGE(gos) (p<0.1). 1,5-AG correlates with MBG (p<0.05) but not with MIME∆G, MAGE(gos and c) or SD. At V2: FA correlates with MBG (p<0.01), MIME∆G (p<0.01), but not with MAGE(gos and c) (p<0.1) , SD (p=0.061) . 1,5-AG correlates with MIME∆G (p<0.05] but not with MAGE(gos a…	Mixed model analysis
47	Fang FS, Li ZB, Li CL, Tian H, Li J, Cheng XL.	Influence of glycemic variability on the HbA1c level in elderly male patients with type 2 diabetes	2012	Intern Med	291	291	76.3		9.1			291/0	25.2	2.6								16.4	9.7			Diet (n=11), Metformin (n=129), SU (n=62), Glinide (n=40), TZD (n=19), α-glucosidase I (n=184), Insulin (n=165)			7.1	1.2									Cross-sectionnal study		NA	72h	CGMS	Univariate analysis: MAGE correlates with HbA1c (r=0.229, p<0.001), PPBG (r=0.165, p=0.006) but not with FBG. Logistic regression analysis: compared to the lowest quartile of the MAGE, the highest quartile had higher risk of having an abnormal HbA1c (p<0.001)	Pearson's correlation analysis and logistic regression model
48	Kim MJ, Jung HS, Hwang-Bo Y, Cho SW, Jang HC, Kim SY, Park KS.	Evaluation of 1,5-anhydroglucitol as a marker for glycemic variability in patients with type 2 diabetes mellitus	2013	Acta Diabetol	60	60	60		10			22/38	24.4	2.9								17	10			Drug-naïve (n=2), OAD (n=21), Insulin (n=37)			7.8	0.7			132	37					Cross-sectionnal study		NA	72h	CGMS	Univariate analysis: log[1,5-AG) correlates with MIME∆G (-0.264, p<0.05) but not with CONGA1, MAGE and MODD. HbA1c correlates with MBG (0.459, p<0.01), MIME∆G (0.400, p<0.01) but not with MAGE, MODD and CONGA1. Correlation between 8-iso-PGF2α and MBG (0.509, p<0.05), CONGA1 (0.674, p<0.01), MAGE (0.703, p<0.01), MIME∆G (0.582, p<0.05) but not MODD only in men.	Pearson’s or Spearman’s correlation coefficient analysis
49	Kohnert KD, Vogt L, Augstein P, Heinke P, Zander E, Peterson K, Freyse EJ, Salzsieder E.	Relationships between glucose variability and conventional measures of glycemic control in continuously monitored patients with type 2 diabetes	2009	Horm Metab Res.	114	114	63.5		8.3			61/53	30.8	4.2								7	5.7			Drug-naïve, Glibenclamide, Glimiperide, Metformin			6.8	1.1			8.2	2.1					Cross-sectionnal study	95	4 days	65 +/- 14h	CGMS	Univariate analysis: HbA1c correlates with MAGE (r=0.27, p<0.01), IQR50 (r=0.31, p=0.001), SD (r=0.34, p<0.001), ADRR (r=0.24, p=0.01), LGBI (r=-0.27, p=0.01), HGBI (r=0.49, p<0.001). FBG correlates with MAGE, IQR50, SD, ADRR, HBGI, LBGI (r=0.28-0.62, p<0.01).	Spearman correlation analyses
11	Ohara M., Hiromura M., Nagaike H., Kohata Y., Fujikawa T., Goto S., Sato N., Kushima H., Terasaki M., Yamamoto T., Mori Y.,Hayashi T., Fukui T., Yamagishi S., Hirano T.	Relationship between glucose variability evaluated by continuous glucose monitoring and clinical factors, including glucagon-stimulated insulin secretion in patients with type 2 diabetes	2019	Diabetes Res Clin Pract	83	83	63.7		11.5			48/35	25.6	4.4								15.8	10.4			Metformin (n=29), SU (n=3), Glinide (n=3), α-glucosidase I (n=21), TZD (n=12), SGLT2I (n=4), DPP4I (n=34), GLP1ra (n=16), Insulin (n=83)			7.5	1.4			130	36					Cross-sectionnal study		4 days	72h	CGMS	Univariate analysis: MAGE correlates with FBG (0.370, p<0.01), HbA1c (0.546, p<0.01) and ΔCpeptide (-0.736, p<0.01). CV correlates with HbA1c (0.362, p<0.01) and ΔCpeptide (-0.326, p<0.01) but not with FBG. MODD correlates with FBG (0.443, p<0.01), HbA1c (0.351, p<0.01) and ΔCpeptide (-0.277, p<0.05). Multivariate analysis: MAGE correlates with FBG (0.287, p<0.01), HbA1c (0.266, p<0.01) and ΔCpep…	Spear-man’s correlation coefficient analysis. Multiple stepwise regression analysis	(1) Insulin treated T2DM. (2) No association with treatments
11	Ohara M., Hiromura M., Nagaike H., Kohata Y., Fujikawa T., Goto S., Sato N., Kushima H., Terasaki M., Yamamoto T., Mori Y.,Hayashi T., Fukui T., Yamagishi S., Hirano T.	Relationship between glucose variability evaluated by continuous glucose monitoring and clinical factors, including glucagon-stimulated insulin secretion in patients with type 2 diabetes	2019	Diabetes Res Clin Pract	126	126	62.1		13.3			80/46	26.2	4.8								10.9	8.4			Diet alone (n=18), Metformin (n=48), SU (n=49), Glinide (n=8), α-glucosidase I (n=28), TZD (n=15), SGLT2I (n=6), DPP4I (n=59), GLP1ra (n=29), Insulin (n=0)			8.1	1.6			140	36					Cross-sectionnal study		4 days	72h	CGMS	Univariate analysis: MAGE correlates with FBG (0.461, p<0.01), HbA1c (0.609, p<0.01) but not with ΔCpeptide. No correlation between CV and HbA1c or FBG or ΔCpeptide. MODD correlates with FBG (0.322, p<0.01), HbA1c (0.346, p<0.01) but not with ΔCpeptide. Multivariate analysis: MAGE correlates with HbA1c (0.501, p<0.01) but not with FBG or ΔCpeptide. CV corelates with ΔCpeptide (-0.175, p<0.05) ut …	Spearman’s correlation coefficient analysis. Multiple stepwise regression analysis	(1) T2DM without insulin therapy. (2) Multiple regression analysis : MAGE and CV correlate with use of SU (p<0.01) and CV correlates with use of a-glucosidase I (p<0.01). Besides, MAGE was independently correlated with dose of SU (p=0.044).
50	Ohara, M., Kohata, Y., Nagaike, H., (...), Fukui, T., Hirano, T.	Association of glucose and blood pressure variability on oxidative stress in patients with type 2 diabetes mellitus and hypertension: A cross-sectional study	2019	Diabetol Metab Syndr.	60	60	64.5		13.3			34/26	27.6	4.5								13.9	12.4			Drug-naïve(n=16), Metformin (n=21), SU (n=24), DPP4I (n=25), α-glucosidase I (n=11), TZD (n=11), SGLT2I (n=6), GLP1ra (n=7), Insulin( n=14)	Macroangiopathy n=14, nephropathy n=25, neuropathy n=31, retinopathy n=21		8.5	1.2			141.9	33.9					Cross-sectionnal study		4 days	72h	CGMS	Univariate analysis: MBG correlates with FBG (0.630, p<0.01), HbA1c (0.659, p<0.01). HbA1c correlates with MAGE (0.334, p<0.01). d-ROMs correlates with CV (0.329, p<0.05), MAGE (0.448, p<0.01). FBG correlates with MAGE (0.300, p<0.05). LF/HF positively correlates with MAGE at nightime (r=0.319, p=0.013). Signifcant correlations were observed between MAGE and nighttime SD of SBP (r=0.374; p=0.003)…	Pearson’s correlation coefficient analysis
51	Lu J, Ma X, Zhang L, Mo Y, Ying L, Lu W, Zhu W, Bao Y, Zhou J	Glycemic variability assessed by continuous glucose monitoring and the risk of diabetic retinopathy in latent autoimmune diabetes of the adult and type 2 diabetes	2019	J Diabetes Investig.	2927	2927	57.7		10.1			42.7% / 57.3%	25.1	3.4								7.7	6.3			OADs (55.3%), Insulin (68.0%)			8.9	2.1									Cross-sectionnal study		NA	72h	CGMS	Univariate analysis: SD (1.30, p<0.001), CV (1.16, p<0.001) and MAGE (1.21, p<0.001) are positively associated with DDR. Prevalence of DR increased with ascending quartiles of SD (p<0.001) and MAGE (p<0.001) but not CV. Multivariate logistic regression: SD is independantly associated with DR (1.15, p=0.017) but not CV and MAGE	Univariate logistic regression and multivariate logistic regression
52	Hu YM, Zhao LH, Zhang XL, Cai HL, Huang HY, Xu F, Chen T, Wang XQ, Guo AS, Li JA, Su JB	Association of glycaemic variability evaluated by continuous glucose monitoring with diabetic peripheral neuropathy in type 2 diabetic patients	2018	Endocrine.	982	982	55.1		10.9			497/485	25.1	3.5							5.2				4.2-8.0	Drug-naïve (n=96), Insulin injection (n=299), Insulin secretagogues (n=385), Metformin (n=440), TZD (n=516)	197 with Diabetic Peripheral Neuropathy (DPN)		9.9	1.3									Cross-sectionnal study		NA	3 days	CGMS	Univariate analysis: MAGE (4.27, p<0.001), MODD (2.57, p<0.001), SD (3.71, p<0.001) and MBG (1.55, p<0.001) were positively associated with DPN. Multivariate logistic regression: only MAGE (1.52, p<0.001) was independent contributor to DPN.	Univariate logistic regression and multivariate logistic regression
