# Supplementary material for: CGMS and Glycemic Variability, Relevance in Clinical Research to Evaluate Interventions in T2D, a Literature Review
Source: Front Endocrinol (Lausanne). 2021 Sep 9;12:666008. doi: 10.3389/fendo.2021.666008 (PMC8458933; doi:10.3389/fendo.2021.666008)
Supplement: Supplementary Table 4 — Summary of studies included in Part 2 analysis. [file Table_4.xlsx]

## Sheet: Table S4
Reference number	Authors	Title	Year	Source	Sample size	Subjects analyzed	Intervention type	Study duration	CGMS duration
53	Peng, J., Lu, J., Ma, X., (...), Bao, Y., Zhou, J.	Breakfast replacement with a liquid formula improves glycaemic variability in patients with type 2 diabetes: A randomised clinical trial	2019	Br J Nutr.	131	123	Nutritional	4 wks	twice 72h
54	Luo, Y., Ni, W.-J., Ding, B., (...), Ma, J.-H., Zhu, J.	Efficacy Comparison of Preprandial and Postprandial Prandilin 25 Administration in Patients with Newly Diagnosed Type 2 Diabetes Using a Continuous Glucose Monitoring System	2019	Diabetes Ther	97	85	Pharmacological	2 days	twice 24h
55	Li, L.-Q., Yao, M.-Y., Ma, J.-X., Xue, P., Li, Y.-K.	Continuous subcutaneous insulin infusion combined with liraglutide reduced glycemic variability and oxidative stress in type 2 diabetes mellitus: A study based on the flash glucose monitoring system	2019	Endocr J	68	60	Pharmacological	2 wks	2 weeks
56	Kim, N.H., Kim, D.-L., Kim, K.J., (...), Baik, S.H., Kim, S.G.	Effects of vildagliptin or pioglitazone on glycemic variability and oxidative stress in patients with type 2 diabetes inadequately controlled with metformin monotherapy: A 16-week, randomised, open label, pilot study	2017	Endocrinol Metab	31	25	Pharmacological	16 wks	twice 3 days
57	Karstoft, K., Clark, M.A., Jakobsen, I., (...), Solomon, T.P.J., Ried-Larsen, M.	The effects of 2 weeks of interval vs continuous walking training on glycaemic control and whole-body oxidative stress in individuals with type 2 diabetes: a controlled, randomised, crossover trial	2017	Diabetologia	14	14	Physical activity	6 weeks (3 periods of 2 wks)	twice 24h each 2 weeks
58	Yin, T.-T., Bi, Y., Li, P., (...), Feng, W.-H., Zhu, D.-L.	Comparison of Glycemic Variability in Chinese T2DM Patients Treated with Exenatide or Insulin Glargine: A Randomized Controlled Trial	2018	Diabetes Ther.	39	39	Pharmacological	16 wks	twice 3 days
59	Tsujino, D., Nishimura, R., Onda, Y., (...), Ando, K., Utsunomiya, K.	Biphasic insulin aspart-30 reduces glycemic variability to a greater degree than insulin detemir: A randomized controlled trial of once-daily insulin regimens using continuous glucose monitoring	2018	J Diabetes Investig	30	30	Pharmacological	at least 2 months of treatment	1 day
60	Frías, J.P., Nakhle, S., Ruggles, J.A., (...), Zhou, R., Strange, P.	Exenatide once weekly improved 24-hour glucose control and reduced glycaemic variability in metformin-treated participants with type 2 diabetes: a randomized, placebo-controlled trial	2017	Diabetes Obes Metab	116	116	Pharmacological	10 wks	3 periods of 7 days
61	Garg, R., Schuman, B., Hurwitz, S., Metzger, C., Bhandari, S.	Safety and efficacy of saxagliptin for glycemic control in non-critically ill hospitalized patients	2017	BMJ Open Diabetes Res Care	74	66	Pharmacological	6 days	6 days
62	Jendle, J., Testa, M.A., Martin, S., Jiang, H., Milicevic, Z.	Continuous glucose monitoring in patients with type 2 diabetes treated with glucagon-like peptide-1 receptor agonist dulaglutide in combination with prandial insulin lispro: an AWARD-4 substudy	2016	Diabetes Obes Metab	144 (Sub analysis of AWARD-4 cohort of 884 patients)	144	Pharmacological	52 wks	4 periods of 3 days
63	Zhou, J., Zheng, F., Guo, X., (...), Mo, Y., Jia, W.	Glargine insulin/gliclazide MR combination therapy is more effective than premixed insulin monotherapy in Chinese patients with type 2 diabetes inadequately controlled on oral antidiabetic drugs	2015	Diabetes Metab Res Rev	105	101	Pharmacological	12 wks	twice 3 days
29	Farabi, S.S., Carley, D.W., Smith, D., Quinn, L.	Impact of exercise on diurnal and nocturnal markers of glycaemic variability and oxidative stress in obese individuals with type 2 diabetes or impaired glucose tolerance	2015	Diab Vasc Dis Res	37	37	Physical activity	6 days	twice 3 days
64	Yamazaki, M., Hasegawa, G., Majima, S., (...), Fukui, M., Nakamura, N.	Effect of repaglinide versus glimepiride on daily blood glucose variability and changes in blood inflammatory and oxidative stress markers	2014	Diabetol Metab Syndr	10	9	Pharmacological	12 wks	twice 3 days
65	Monnier, L., Dejager, S., Serusclat, P., (...), Quéré, S., Guerci, B.	Vildagliptin versus sitagliptin in add-on to metformin: Are they equivalent? Results of the OPTIMA study | [Vildagliptine versus sitagliptine en addition à la metformine: Sont-elles équivalentes? Résultats de l'étude OPTIMA]	2014	Médecine des Maladies Métaboliques	38	30	Pharmacological	8 wks	twice 3 days
30	Bao, Y.-Q., Zhou, J., Zhou, M., (...), Lu, H.-J., Jia, W.-P.	Glipizide controlled-release tablets, with or without acarbose, improve glycaemic variability in newly diagnosed Type 2 diabetes	2010	Clin Exp Pharmacol Physiol	46	40	Pharmacological	8 wks	twice 3 days
66	Bao, Y.-Q., Zhou, M., Zhou, J., (...), Lu, H.-J., Jia, W.-P.	Relationship between serum osteocalcin and glycaemic variability in Type 2 diabetes	2011	Clin Exp Pharmacol Physiol	59	59	Pharmacological	8 wks	twice 3 days
67	Henry, RR., Strange, P., Zhou, R., Pettus, J., Shi, L., Zhuplatov, SB., Mansfield, T., Klein, D., Katz, A.	Effects of Dapagliflozin on 24-Hour Glycemic Control in Patients with Type 2 Diabetes: A Randomized Controlled Trial	2018	Diabetes Technol Ther	100	97	Pharmacological	4 wks	twice 7 days
68	Pratley, RE., Rosenstock, J., Heller, SR., Sinclair, A, Heine, RJ., Kiljański, J., Brusko, CS., Duan, R., Festa, A.	Reduced Glucose Variability With Glucose-Dependent Versus Glucose-Independent Therapies Despite Similar Glucose Control and Hypoglycemia Rates in a Randomized, Controlled Study of Older Patients With Type 2 Diabetes Mellitus	2018	J Diabetes Sci Technol	47 (Sub analysis of IMPERIUM project)	46	Pharmacological	24 wks	twice 72h
69	Vianna, AGD., Lacerda, CS., Pechmann, LM., Polesel, MG., Marino, EC., Faria-Neto, JR.	A randomized controlled trial to compare the effects of sulphonylurea gliclazide MR (modified release) and the DPP-4 inhibitor vildagliptin on glycemic variability and control measured by continuous glucose monitoring (CGM) in Brazilian women with type 2 diabetes	2018	Diabetes Res Clin Pract	42	37	Pharmacological	24 wks	twice 48h
70	Kim, G., Oh, S., Jin, SM., Hur, KY., Kim, JH., Lee, MK.	The efficacy and safety of adding either vildagliptin or glimepiride to ongoing metformin therapy in patients with type 2 diabetes mellitus	2017	Expert Opin Pharmacother	34	34	Pharmacological	12 wks	twice 3 days
71	Park, KS., Kwak, S., Cho, YM., Park, KS., Jang, HC., Kim, SY., Jung, HS.	Vildagliptin reduces plasma stromal cell-derived factor-1α in patients with type 2 diabetescompared with glimepiride	2017	J Diabetes Investig	18	18	Pharmacological	24 wks (twice 12 wks)	twice 48h
72	FLAT-SUGAR Trial Investigators. Probstfield, J.L., Hirsch, I.B., Davis, B.R., (...), Riddle, M., O'Brien, K.D.	Glucose Variability in a 26-Week Randomized Comparison of Mealtime Treatment With Rapid-Acting Insulin Versus GLP-1 Agonist in Participants With Type 2 Diabetes at High Cardiovascular Risk	2016	Diabetes Care	102	96	Pharmacological	26 wks	twice 7-10 days
73	Conget, I., Castaneda, J., Petrovski, G., Guerci, B., Racault, AS., Reznik, Y., Cohen, O., Runzis, S., de Portu, S., Aronson, R.; OpT2mise Study Group.	The Impact of Insulin Pump Therapy on Glycemic Profiles in Patients with Type 2 Diabetes: Data from the OpT2mise Study	2016	Diabetes Technol Ther.	331	331	Pharmacological	6 mths	twice 6 days
74	Tay, J., Luscombe-Marsh, ND., Thompson, CH., Noakes, M., Buckley, JD., Wittert, GA., Yancy, WS Jr., Brinkworth, GD.	Comparison of low- and high-carbohydrate diets for type 2 diabetes management: a randomized trial	2015	Am J Clin Nutr	115	78	Nutritional	52 wks	3 periods of 48h
75	Baek, JH., Jin, SM., Kaku, K., Jung, JA., Kim, JR., Ko, JW., Kim, MJ., Lee, SY., Huh, WS., Kim, JH.	Efficacy of mitiglinide and sitagliptin, alone or in combination, on postprandial excursion and glycemic variability assessed by continuous glucose monitoring: a post hoc analysis with single-day treatment	2015	Expert Opin Pharmacother	26	24	Pharmacological	3 periods of 1 day	3 periods of 2 days
76	Ando, K., Nishimura, R., Seo, C., Tsujino, D., Sakamoto, M., Utsunomiya, K.	Comparing postprandial efficacy in type 2 diabetic patients receiving mitiglinide and sitagliptin by using continuous glucose monitoring: a pilot study	2014	Expert Opin Pharmacother	11	11	Pharmacological	2 periods of 1 mth	twice 4 days
77	Bergenstal, RM., Rosenstock, J., Bastyr, EJ., Prince, MJ., Qu, Y., Jacober, SJ.	Lower glucose variability and hypoglycemia measured by continuous glucose monitoring with novel long-acting insulin LY2605541 versus insulin glargine	2014	Diabetes Care	76 (Sub group of a larger cohort)	76	Pharmacological	12 wks	3periods of 3 days
78	Kim, HS., Shin, JA., Lee, SH., Kim, ES., Cho, JH., Son, HY., Yoon, KH.	A comparative study of the effects of a dipeptidyl peptidase-IV inhibitor and sulfonylurea on glucose variability in patients with type 2 diabetes with inadequate glycemic control on metformin	2013	Diabetes Technol Ther.	33	33	Pharmacological	4 wks	twice 3 days
79	Lin, SD., Wang, JS., Hsu, SR., Sheu, WH., Tu, ST., Lee, IT., Su, SL., Lin, SY., Wang, SY., Hsieh, MC.	The beneficial effect of α-glucosidase inhibitor on glucose variability compared with sulfonylurea in Taiwanese type 2 diabetic patients inadequately controlled with metformin: preliminary data	2011	J Diabetes Complications	51	40	Pharmacological	16 wks	twice 3 days
80	Irace, C., Fiorentino, R., Carallo, C., Scavelli, F., Gnasso, A.	Exenatide improves glycemic variability assessed by continuous glucose monitoring in subjects with type 2 diabetes	2011	Diabetes Technol Ther	12	12	Pharmacological	16 wks	twice 2 days
81	Johnson, SL., McEwen, LN., Newton, CA., Martin, CL., Raskin, P., Halter, JB., Herman, WH.	The impact of continuous subcutaneous insulin infusion and multiple daily injections of insulin on glucose variability in older adults with type 2 diabetes	2011	J Diabetes Complications	107	107	Pharmacological	12 mths	3 periods of 3 days
82	Zhou, J., Jia, W., Bao, Y., Ma, X., Lu, W., Li, H., Hu, C., Xiang, K.	Glycemic variability and its responses to intensive insulin treatment in newly diagnosed type 2 diabetes	2008	Med Sci Monit	69	23	Pharmacological	2 to 3 wks	twice 3 days
83	Kwak, SH., Hwang, YC., Won, JC., Bae, JC., Kim, HJ., Suh, S., Lee, EY., Lee, S., Kim, SY., Kim, JH.	Comparison of the effects of gemigliptin and dapagliflozin on glycaemic variability in type 2 diabetes: A randomized, open-label, active-controlled, 12-week study (STABLE II study)	2020	Diabetes Obes Metab	71	70	Pharmacological	12 wks	twice 72h
84	Sofizadeh, S., Imberg, H., Ólafsdóttir, A.F., (...), Tuomilehto, J., Lind, M.	Effect of Liraglutide on Times in Glycaemic Ranges as Assessed by CGM for Type 2 Diabetes Patients Treated With Multiple Daily Insulin Injections	2019	Diabetes Ther	124 (Sub-analysis of the FAS cohort population)	122	Pharmacological	24 wks	3 periods of 24h
85	Nishimura, R., Osonoi, T., Koike, Y., Miyata, K., Shimasaki, Y.	A Randomized Pilot Study of the Effect of Trelagliptin and Alogliptin on Glycemic Variability in Patients with Type 2 Diabetes	2019	Adv Ther	27	27	Pharmacological	29 days	2 periods of 2-7 days
86	Nomoto, H., Miyoshi, H., Sugawara, H., (...), Nakamura, A., Atsumi, T.	A randomized controlled trial comparing the effects of dapagliflozin and DPP-4 inhibitors on glucose variability and metabolic parameters in patients with type 2 diabetes mellitus on insulin	2017	Diabetol Metab Syndr.	36	29	Pharmacological	12 wks	2 periods of 3-5 days
87	Carlson, A.L., Mullen, D.M., Mazze, R., (...), Richter, S., Bergenstal, R.M.	Evaluation of insulin glargine and exenatide alone and in combination: A randomized clinical trial with continuous glucose monitoring and ambulatory glucose profile analysis	2019	Endocr Pract.	60	49	Pharmacological	32 wks	6 periods of 14 days
88	Blaychfeld-Magnazi, M., Reshef, N., Zornitzki, T., Madar, Z., Knobler, H.	The effect of a low-carbohydrate high-fat diet and ethnicity on daily glucose profile in type 2 diabetes determined by continuous glucose monitoring	2019	Eur J Nutr.	20	20	Nutritional	4 days (twice 2 days )	4 days
